# Supplementary material for: Genetic interactions between planar cell polarity genes cause diverse neural tube defects in mice
Source: PubMed Central journal article supplement (PMC4174526; doi:10.1242/dmm.016758), 2014-08-15
Supplement: supp_016758_DMM016758.pdf [file supp_016758_DMM016758.pdf]

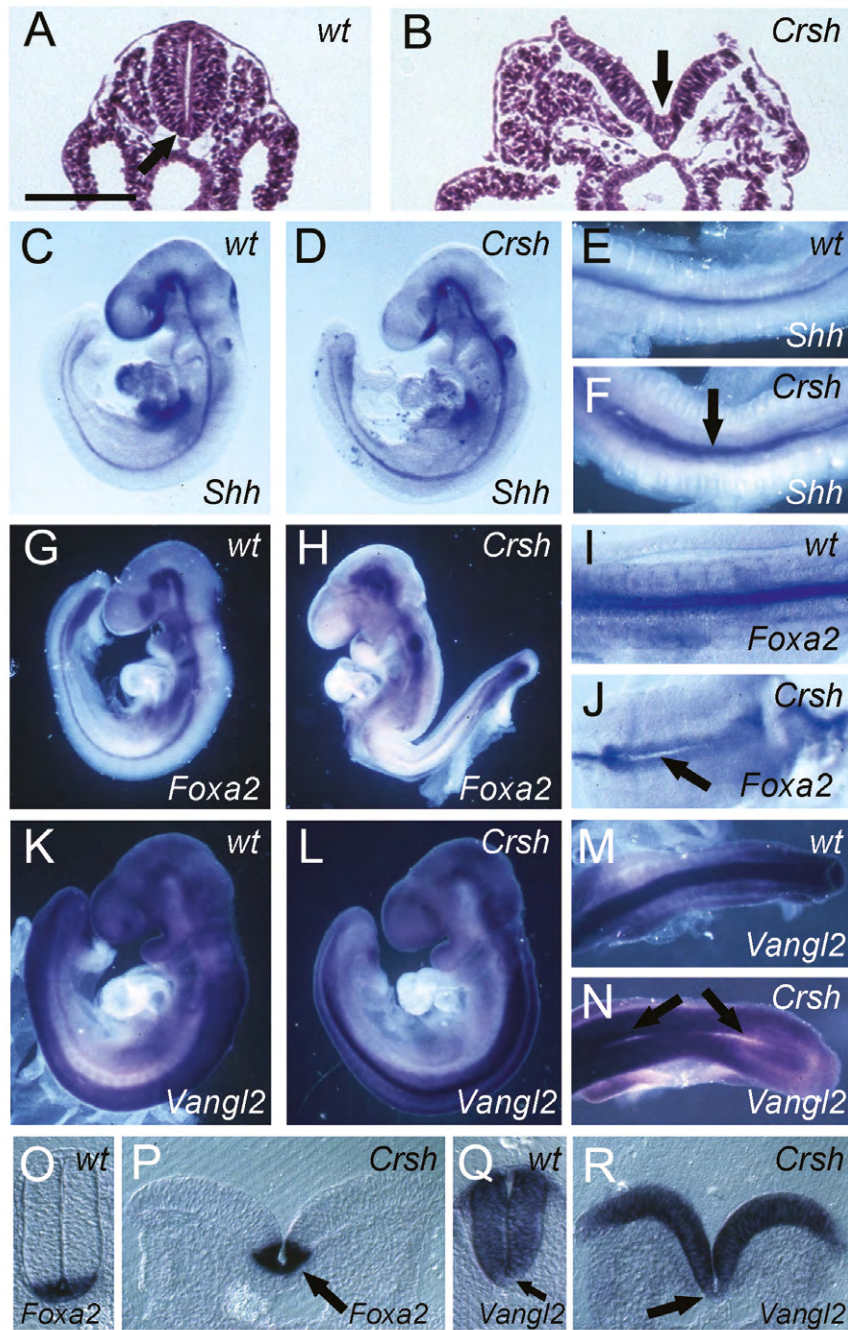

**Supplementary Fig. 1. *Celsr1<sup>Crsh/Crsh</sup>* mutants exhibit midline abnormalities of the neuroepithelium at the stage of neural tube closure initiation.** (A,B) H & E stained transverse sections through E8.5 (10 somite stage) embryos, just after the stage of closure initiation. The wild-type embryo (A) shows a compact ventral midline in the neuroepithelium (A, arrow), whereas the *Celsr1<sup>Crsh/Crsh</sup>* homozygous mutant littermate exhibits a persistently open neural tube with enlarged ventral midline region (B, arrow). (C-J) *In situ* hybridisation for the midline markers *Shh* (C-F) and *Foxa2* (G-J) reveal similar expression patterns in wild-type (C,G) and *Celsr1<sup>Crsh/Crsh</sup>* mutants (D,H) when viewed laterally, but dorsal views of the caudal neural tube reveal an enlarged or bifurcated midline in the mutant (arrows in F,J) compared with wild-type (E,I). (K-N) *In situ* hybridisation for *Vangl2* reveals similar expression in wild-type (K) and *Celsr1<sup>Crsh/Crsh</sup>* homozygous (L) embryos when viewed laterally (K,L), but dorsal views of the caudal neural tube reveal a widened ventral midline that is negative for *Vangl2* expression in the mutant (arrows in N), although not in wild-type (M). (O,P) Transverse sections of embryos hybridized as whole mounts for *Foxa2* expression. Compared with wild-type (O), the *Celsr1<sup>Crsh/Crsh</sup>* embryo (P) exhibits a widened domain of *Foxa2* expression. (Q,R) Transverse sections of embryos hybridized as whole mounts for *Vangl2* expression. Similar expression patterns are seen in wild-type (Q) and *Celsr1<sup>Crsh/Crsh</sup>* (R), although the ventral midline region that lacks *Vangl2* expression (R, arrow) appears wider in the *Celsr1<sup>Crsh/Crsh</sup>* mutant. Scale bar in (A) represents 0.1 mm (A,B), 1.25 mm (C,D,G,H), 0.6 mm (E,F,M-P), 0.5 mm (I,J), 1 mm (K,L), 0.16 mm (Q,R).

**Supplementary Table 1. Genotype distribution of offspring from intercrosses between *Vangl2*<sup>Lp/+</sup>, *Scrib*<sup>Crc/+</sup>, *Celsr1*<sup>Crsh/+</sup> and *Celsr1*<sup>Scy/+</sup> on C3H/HeH background.**

| Cross<br>(female x male)                                        | Genotype <sup>a</sup>            |                       |                        |             | Total | Ratios <sup>b</sup>                             |
|-----------------------------------------------------------------|----------------------------------|-----------------------|------------------------|-------------|-------|-------------------------------------------------|
| <i>Scrib</i> <sup>Crc/+</sup> x <i>Vangl2</i> <sup>Lp/+</sup>   | <i>Lp</i> /+;<br><i>Crc</i> /+   | <i>Lp</i> /+;<br>+/+  | +/+;<br><i>Crc</i> /+  | +/+;<br>+/+ |       | <i>Lp</i> :+ = 66:42<br><i>Crc</i> :+ = 58:50   |
| Observed no.                                                    | 32                               | 34                    | 26                     | 16          | 108   |                                                 |
| Expected no.                                                    | 27                               | 27                    | 27                     | 27          |       | <i>p</i> < 0.05 <sup>c</sup>                    |
| <i>Vangl2</i> <sup>Lp/+</sup> x <i>Celsr1</i> <sup>Crsh/+</sup> | <i>Lp</i> /+;<br><i>Crsh</i> /+  | <i>Lp</i> /+;<br>+/+  | +/+;<br><i>Crsh</i> /+ | +/+;<br>+/+ |       | <i>Lp</i> :+ = 41:32<br><i>Crsh</i> :+ = 38:35  |
| Observed no.                                                    | 25                               | 16                    | 13                     | 19          | 73    |                                                 |
| Expected no.                                                    | 18.25                            | 18.25                 | 18.25                  | 18.25       |       | <i>p</i> > 0.05                                 |
| <i>Scrib</i> <sup>Crc/+</sup> x <i>Celsr1</i> <sup>Crsh/+</sup> | <i>Crc</i> /+;<br><i>Crsh</i> /+ | <i>Crc</i> /+;<br>+/+ | +/+;<br><i>Crsh</i> /+ | +/+;<br>+/+ |       | <i>Crc</i> :+ = 82:89<br><i>Crsh</i> :+ = 90:81 |
| Observed no.                                                    | 41                               | 41                    | 49                     | 40          | 171   |                                                 |
| Expected no.                                                    | 42.75                            | 42.75                 | 42.75                  | 42.75       |       | <i>p</i> > 0.05                                 |
| <i>Celsr1</i> <sup>Scy/+</sup> x <i>Scrib</i> <sup>Crc/+</sup>  | <i>Crc</i> /+;<br><i>Scy</i> /+  | <i>Crc</i> /+;<br>+/+ | +/+;<br><i>Scy</i> /+  | +/+;<br>+/+ |       | <i>Crc</i> :+ = 28:28<br><i>Scy</i> :+ = 34:22  |
| Observed no.                                                    | 18                               | 10                    | 16                     | 12          | 56    |                                                 |
| Expected no.                                                    | 14                               | 14                    | 14                     | 14          |       | <i>p</i> > 0.05                                 |

<sup>a</sup> Genotype of offspring collected from each intercross.

<sup>b</sup> Ratio of mutant: wild-type allele for each gene.

<sup>c</sup>  $\chi^2$  tests to assess whether observed ratios of mutant alleles in offspring differ statistically from expected values.

Supplementary Table 2. Penetrance of heterozygote phenotypes before and after generation of sub-congenic strains on C3H/He background.

|                                 | Phenotype                         | Penetrance in offspring of heterozygote crosses <sup>1</sup> |                   | Statistical comparison |
|---------------------------------|-----------------------------------|--------------------------------------------------------------|-------------------|------------------------|
|                                 |                                   | Original background                                          | C3H/He background |                        |
| <i>Celsr1</i> <sup>Crsh/+</sup> | Shaky-head behaviour <sup>2</sup> | 275/811 (68%)                                                | 68/425 (32%)      | $p < 0.001$            |
| <i>Vangl2</i> <sup>Lp/+</sup>   | Looped tail <sup>3</sup>          | 614/1361 (90%)                                               | 226/818 (55%)     | $p < 0.001$            |

<sup>1</sup> Penetrance calculated on the basis that half of the offspring would be expected to exhibit the defect, if fully penetrant.

<sup>2</sup> Shaky-head behaviour is characteristic of *Celsr1*<sup>Crsh</sup> heterozygotes, and likely derives from vestibular dysfunction.

<sup>3</sup> The looped tail defect characterizes *Vangl2*<sup>Lp/+</sup> heterozygotes and reflects delayed closure of the spinal neural tube (Copp et al., 1994). *Vangl2*<sup>Lp/+</sup> tail defects were less severe on the C3H/HeH background, with frequent occurrence of a loose loop or kink instead of the tight looping or knot that is more characteristic of the phenotype on the original LPT/CBA background.

Supplementary Table 3. Intercrosses between *Celsr1*<sup>Crsh/+</sup> females and *Vangl2*<sup>Lp/+</sup>; *Scrib*<sup>Crc/+</sup> males generate all classes of offspring and show a range of phenotypes

|                                              | Genotype at each locus |              |               |             |               |              |               |            | Ratios <sup>a</sup> |
|----------------------------------------------|------------------------|--------------|---------------|-------------|---------------|--------------|---------------|------------|---------------------|
| <b><i>Vangl2</i><br/>(<i>Lp</i> locus)</b>   | <i>Lp/+</i>            | <i>Lp/+</i>  | <i>Lp/+</i>   | <i>Lp/+</i> | <i>+/+</i>    | <i>+/+</i>   | <i>+/+</i>    | <i>+/+</i> | 12:10               |
| <b><i>Scrib</i><br/>(<i>Crc</i> locus)</b>   | <i>Crc/+</i>           | <i>Crc/+</i> | <i>+/+</i>    | <i>+/+</i>  | <i>Crc/+</i>  | <i>Crc/+</i> | <i>+/+</i>    | <i>+/+</i> | 13:9                |
| <b><i>Celsr1</i><br/>(<i>Crsh</i> locus)</b> | <i>Crsh/+</i>          | <i>+/+</i>   | <i>Crsh/+</i> | <i>+/+</i>  | <i>Crsh/+</i> | <i>+/+</i>   | <i>Crsh/+</i> | <i>+/+</i> | 13:9                |
| <b>Number</b>                                | 3                      | 4            | 3             | 2           | 4             | 2            | 3             | 1          |                     |
| <b>Phenotypes<sup>b</sup></b>                | CRN                    | LT           | CRN           | LT          | Normal        | Normal       | LT            | Normal     |                     |
|                                              | CRN                    | LT           | CRN           | LT          | Normal        | Normal       | Normal        |            |                     |
|                                              | EX                     | LT           | LT            |             | Normal        |              | Normal        |            |                     |
|                                              |                        | LT           |               |             | LT            |              |               |            |                     |

<sup>a</sup> Ratio of mutant: wild-type alleles observed at each locus.

<sup>b</sup> Phenotypes of individual fetuses: CRN, craniorachischisis; EX, hindbrain exencephaly; LT, looped tail.
